# Supplementary material
Source: PubMed Central journal article supplement (PMC4744155)
Supplement: NIHMS738983-supplement-Supp_TableS1.pdf [file NIHMS738983-supplement-Supp_TableS1.pdf]

**Table S1.** Complete list of patient samples with their associated demographics and proteomic technique.

| ID   | Disease Category | Age | Gender | Mutation | Proteomic Technique |             |            |              |
|------|------------------|-----|--------|----------|---------------------|-------------|------------|--------------|
|      |                  |     |        |          | 2D-DIGE             | Luminex(MM) | Myriad-RBM | Western Blot |
| 1-1  | Control          | 12  | F      | N/A      | X                   |             | X          |              |
| 1-2  | Control          | 14  | M      | N/A      | X                   |             | X          |              |
| 1-3  | Control          | 11  | M      | N/A      | X                   |             | X          |              |
| 1-4  | Control          | 24  | M      | N/A      | X                   |             | X          |              |
| 1-5  | Control          | 15  | M      | N/A      | X                   |             | X          |              |
| 1-6  | Control          | 11  | F      | N/A      | X                   |             | X          |              |
| 1-7  | Control          | 21  | M      | N/A      | X                   |             | X          |              |
| 1-8  | Control          | 18  | M      | N/A      | X                   |             | X          |              |
| 1-9  | Control          | 9   | M      | N/A      | X                   |             | X          |              |
| 1-10 | Control          | 22  | F      | N/A      |                     |             | X          |              |
| 1-11 | Control          | 16  | F      | N/A      | X                   |             | X          |              |
| 1-12 | Control          | 21  | F      | N/A      |                     |             | X          |              |
| 1-13 | Control          | 18  | M      | N/A      | X                   |             | X          |              |
| 1-14 | Control          | 15  | F      | N/A      | X                   |             | X          |              |
| 1-15 | Control          | 30  | F      | N/A      |                     |             | X          |              |
| 1-16 | Control          | 29  | M      | N/A      |                     |             | X          |              |
| 1-17 | Control          | 19  | M      | N/A      | X                   |             | X          |              |
| 1-18 | Control          | 17  | M      | N/A      | X                   |             | X          |              |
| 1-19 | Control          | 20  | M      | N/A      |                     |             | X          |              |
| 1-20 | Control          | 30  | F      | N/A      |                     |             | X          |              |
| 1-21 | Control          | 19  | F      | N/A      |                     |             | X          |              |
| 1-22 | Control          | 27  | F      | N/A      |                     |             | X          |              |
| 1-23 | Control          | 23  | M      | N/A      |                     |             | X          |              |
| 1-24 | Control          | 18  | M      | N/A      |                     |             | X          |              |
| 1-25 | Control          | 18  | F      | N/A      |                     |             | X          |              |
| 1-26 | Control          | 20  | F      | N/A      |                     |             | X          |              |
| 1-27 | Control          | 14  | M      | N/A      | X                   |             |            |              |
| 1-28 | Control          | 19  | F      | N/A      | X                   |             |            |              |
| 1-29 | Control          | 21  | F      | N/A      | X                   |             |            |              |
| 1-30 | INCL             | 10  | F      | -        | X                   |             |            |              |

|                         |         |    |   |                                |   |   |   |
|-------------------------|---------|----|---|--------------------------------|---|---|---|
| <b>1-31</b>             | INCL    | 22 | F | c96y/g118d                     | X |   |   |
| <b>1-32</b>             | INCL    | 7  | M | Unknown                        | X |   |   |
| <b>1-33</b>             | LINCL   | 11 | F | R208X/splice IVS5-1G→C         | X |   |   |
| <b>1-34</b>             | CLN5    | 12 | F | -                              | X |   |   |
| <b>1-35</b>             | CLN5    | 15 | F | -                              | X |   |   |
| <b>1-36</b>             | JNCL    | 11 | F | 1.02kb del./c.240 del G exon 4 | X |   | X |
| <b>1-37<sup>a</sup></b> | JNCL    | 10 | M | 1.02kb del./1.02kb del.        | X |   | X |
| <b>1-38</b>             | JNCL    | 18 | F | 1.02kb del./IVS7+1G>A          | X |   | X |
| <b>1-39<sup>b</sup></b> | JNCL    | 15 | M | 1.02kb del./V330F              | X |   | X |
| <b>1-40</b>             | JNCL    | 9  | F | 1.02kb del./IVS7+1G>A          | X |   | X |
| <b>1-41<sup>c</sup></b> | JNCL    | 15 | M | 1.02kb del./1.02kb del.        | X |   | X |
| <b>1-42<sup>d</sup></b> | JNCL    | 14 | M | 1.02kb del./1.02kb del.        | X |   | X |
| <b>1-43</b>             | JNCL    | 23 | M | 1.02kb del./1.02kb del.        | X |   | X |
| <b>1-44<sup>e</sup></b> | JNCL    | 18 | F | 1.02kb del./IVS11+5G>A         |   |   | X |
| <b>1-45<sup>f</sup></b> | JNCL    | 14 | F | -                              |   |   | X |
| <b>1-46</b>             | JNCL    | 13 | M | -                              | X |   |   |
| <b>1-47</b>             | JNCL    | 9  | M | -                              | X |   |   |
| <b>1-48</b>             | JNCL    | 16 | M | -                              | X |   |   |
| <b>1-49</b>             | JNCL    | 13 | M | -                              | X |   |   |
| <b>1-50</b>             | JNCL    | 11 | F | -                              | X |   |   |
|                         |         |    |   |                                |   |   |   |
| <b>2-1</b>              | Control | 13 | M | N/A                            |   | X | X |
| <b>2-2</b>              | Control | 13 | F | N/A                            |   | X | X |
| <b>2-3</b>              | Control | 19 | F | N/A                            |   | X | X |
| <b>2-4</b>              | Control | 9  | F | N/A                            |   | X | X |
| <b>2-5</b>              | Control | 16 | F | N/A                            |   | X |   |
| <b>2-6</b>              | Control | 24 | F | N/A                            |   | X |   |
| <b>2-7</b>              | Control | 14 | F | N/A                            |   | X |   |
| <b>2-8</b>              | Control | 16 | F | N/A                            |   | X |   |
| <b>2-9</b>              | Control | 20 | F | N/A                            |   | X |   |
| <b>2-10</b>             | Control | 10 | M | N/A                            |   | X |   |
| <b>2-11</b>             | Control | 7  | M | N/A                            |   | X |   |
| <b>2-12</b>             | Control | 9  | F | N/A                            |   | X |   |

|                   |         |    |   |                         |  |   |  |   |
|-------------------|---------|----|---|-------------------------|--|---|--|---|
| 2-13              | Control | 19 | F | N/A                     |  | X |  |   |
| 2-14              | Control | 10 | M | N/A                     |  | X |  | X |
| 2-15              | Control | 7  | M | N/A                     |  | X |  | X |
| 2-16              | Control | 9  | F | N/A                     |  | X |  | X |
| 2-17              | Control | 24 | F | N/A                     |  | X |  | X |
| 2-18              | Control | 24 | F | N/A                     |  | X |  | X |
| 2-19              | Control | 33 | F | N/A                     |  | X |  |   |
| 2-20              | Control | 25 | M | N/A                     |  | X |  | X |
| 2-21              | Control | 29 | F | N/A                     |  | X |  |   |
| 2-22              | Control | 23 | F | N/A                     |  | X |  |   |
| 2-23              | Control | 23 | M | N/A                     |  | X |  | X |
| 2-24              | Control | 22 | F | N/A                     |  | X |  |   |
| 2-25              | Control | 22 | F | N/A                     |  | X |  |   |
| 2-26              | Control | 22 | M | N/A                     |  | X |  | X |
| 2-27              | INCL    | 6  | F | -                       |  | X |  |   |
| 2-28              | INCL    | 9  | F | -                       |  | X |  |   |
| 2-29              | LINCL   | 7  | F | -                       |  | X |  | X |
| 2-30              | LINCL   | 4  | F | -                       |  | X |  |   |
| 2-31              | LINCL   | 6  | F | -                       |  | X |  |   |
| 2-32              | LINCL   | 8  | M | -                       |  | X |  | X |
| 2-33              | LINCL   | 6  | F | -                       |  | X |  |   |
| 2-34              | LINCL   | 9  | M | -                       |  | X |  | X |
| 2-35              | LINCL   | 11 | M | -                       |  | X |  | X |
| 2-36              | LINCL   | 5  | F | -                       |  | X |  |   |
| 2-37              | LINCL   | 5  | F | -                       |  | X |  |   |
| 2-38              | Other   | 8  | M | -                       |  | X |  |   |
| 2-39              | JNCL    | 24 | M | -                       |  | X |  | X |
| 2-40              | JNCL    | 12 | M | -                       |  | X |  | X |
| 2-41              | JNCL    | 17 | F | -                       |  | X |  | X |
| 2-42              | JNCL    | 21 | F | -                       |  | X |  | X |
| 2-43 <sup>e</sup> | JNCL    | 23 | F | 1.02kb del./IVS11+5G>A  |  | X |  | X |
| 2-44 <sup>b</sup> | JNCL    | 19 | M | 1.02kb del./V330F       |  | X |  | X |
| 2-45 <sup>a</sup> | JNCL    | 15 | M | 1.02kb del./1.02kb del. |  | X |  | X |
| 2-46              | JNCL    | 24 | M | -                       |  | X |  | X |
| 2-47              | JNCL    | 26 | M | -                       |  | X |  | X |

|                                                                                    |      |    |   |                         |  |   |  |  |
|------------------------------------------------------------------------------------|------|----|---|-------------------------|--|---|--|--|
| <b>2-48</b>                                                                        | JNCL | 13 | M | -                       |  | X |  |  |
| <b>2-49<sup>c</sup></b>                                                            | JNCL | 18 | M | 1.02kb del./1.02kb del. |  | X |  |  |
| <b>2-50</b>                                                                        | JNCL | 20 | M | -                       |  | X |  |  |
| <b>2-51</b>                                                                        | JNCL | 31 | F | -                       |  | X |  |  |
| <b>2-52</b>                                                                        | JNCL | 29 | F | -                       |  | X |  |  |
| <b>2-53</b>                                                                        | JNCL | 14 | M | -                       |  | X |  |  |
| <b>2-54<sup>d</sup></b>                                                            | JNCL | 17 | M | 1.02kb del./1.02kb del. |  | X |  |  |
| <b>2-55</b>                                                                        | JNCL | 18 | F | -                       |  | X |  |  |
| <b>2-56</b>                                                                        | JNCL | 17 | M | -                       |  | X |  |  |
| <b>2-57<sup>f</sup></b>                                                            | JNCL | 16 | F | -                       |  | X |  |  |
| <b>2-58</b>                                                                        | JNCL | 18 | F | -                       |  | X |  |  |
| <b>2-59</b>                                                                        | JNCL | 18 | M | -                       |  | X |  |  |
| <b>2-60</b>                                                                        | JNCL | 24 | F | -                       |  | X |  |  |
| <b>a,b,c,d,e,f</b> denotes samples from the same patient but collected years apart |      |    |   |                         |  |   |  |  |
